# Supplementary material for: An Optimized and Cost-Effective RNA Extraction Method for Secondary Metabolite-Enriched Tissues of Norway Spruce (Picea abies)
Source: MDPI journal article supplement (doi:10.3390/plants13030389), 2024-01-28

**Figure S1.** The absorbance spectrum of RNA samples obtained from Norway spruce tissues through various extraction methods. The extraction methods include (A) RNeasy Plant Mini Kit (Qiagen), (B) Spectrum Plant Total RNA Kit (Sigma-Aldrich), (C) TRIzol method, (D) TRIzol-column hybrid method, and (E) modified CTAB method. The absorbance peaks observed at 220 nm (indicating organic contaminants), 260 nm (representing nucleic acids), and 280 nm (indicating protein) serve as indicators of the quality and impurities present in RNA samples extracted using these five different methods.

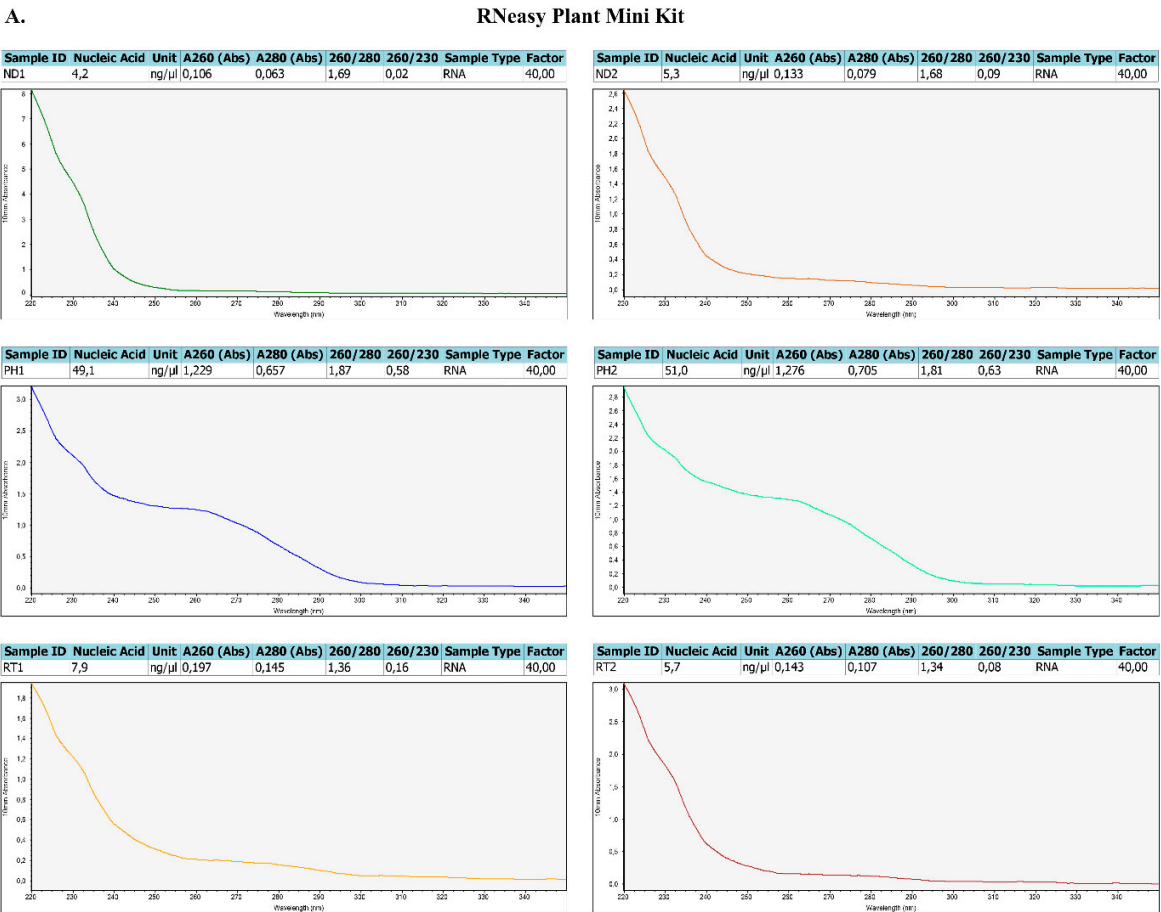

B.

# Spectrum Plant Total RNA Kit

| Sample ID | Nucleic Acid | Unit  | A260 (Abs) | A280 (Abs) | 260/280 | 260/230 | Sample Type | Factor |
|-----------|--------------|-------|------------|------------|---------|---------|-------------|--------|
| ND1       | 154,5        | ng/µl | 3,862      | 2,031      | 1,90    | 0,94    | RNA         | 40,00  |

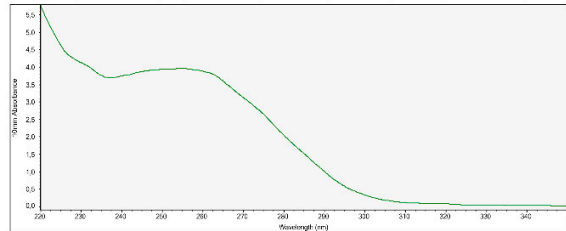

| Sample ID | Nucleic Acid | Unit  | A260 (Abs) | A280 (Abs) | 260/280 | 260/230 | Sample Type | Factor |
|-----------|--------------|-------|------------|------------|---------|---------|-------------|--------|
| ND2       | 175,6        | ng/µl | 4,390      | 2,290      | 1,92    | 0,98    | RNA         | 40,00  |

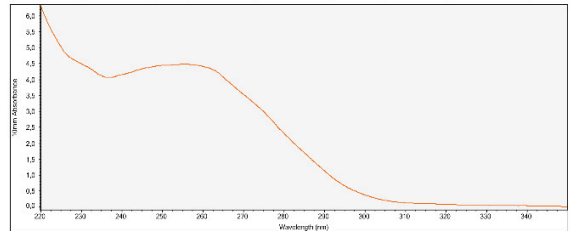

| Sample ID | Nucleic Acid | Unit  | A260 (Abs) | A280 (Abs) | 260/280 | 260/230 | Sample Type | Factor |
|-----------|--------------|-------|------------|------------|---------|---------|-------------|--------|
| PH1       | 62,6         | ng/µl | 1,566      | 0,864      | 1,81    | 0,86    | RNA         | 40,00  |

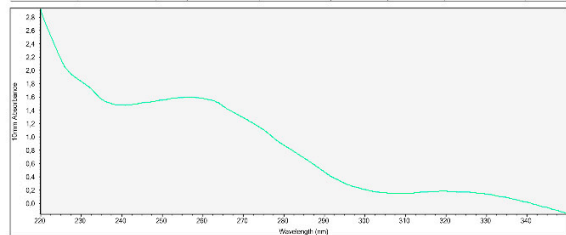

| Sample ID | Nucleic Acid | Unit  | A260 (Abs) | A280 (Abs) | 260/280 | 260/230 | Sample Type | Factor |
|-----------|--------------|-------|------------|------------|---------|---------|-------------|--------|
| PH2       | 68,2         | ng/µl | 1,704      | 0,863      | 1,97    | 1,34    | RNA         | 40,00  |

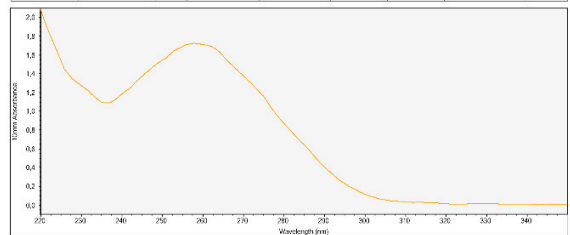

| Sample ID | Nucleic Acid | Unit  | A260 (Abs) | A280 (Abs) | 260/280 | 260/230 | Sample Type | Factor |
|-----------|--------------|-------|------------|------------|---------|---------|-------------|--------|
| RT1       | 27,5         | ng/µl | 0,589      | 0,385      | 1,79    | 0,82    | RNA         | 40,00  |

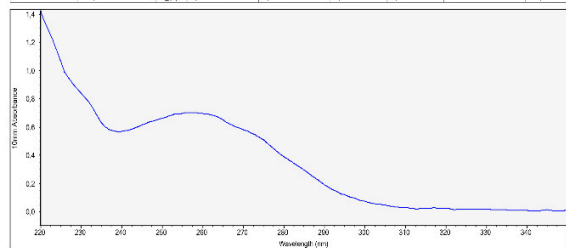

| Sample ID | Nucleic Acid | Unit  | A260 (Abs) | A280 (Abs) | 260/280 | 260/230 | Sample Type | Factor |
|-----------|--------------|-------|------------|------------|---------|---------|-------------|--------|
| RT2       | 2,7          | ng/µl | 0,068      | 0,063      | 1,09    | 0,15    | RNA         | 40,00  |

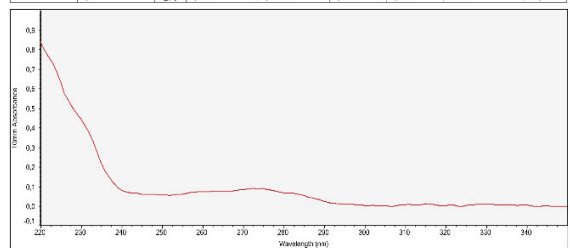

C.

# TRIzol Method

| Sample ID | Nucleic Acid | Unit  | A260 (Abs) | A280 (Abs) | 260/280 | 260/230 | Sample Type | Factor |
|-----------|--------------|-------|------------|------------|---------|---------|-------------|--------|
| ND1       | 59,9         | ng/µl | 1,498      | 1,160      | 1,29    | 0,19    | RNA         | 40,00  |

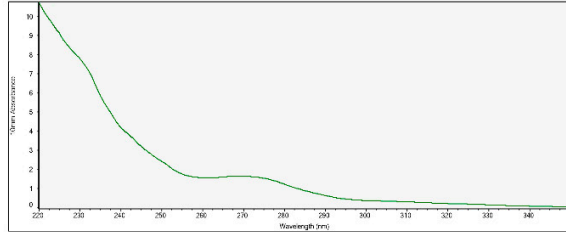

| Sample ID | Nucleic Acid | Unit  | A260 (Abs) | A280 (Abs) | 260/280 | 260/230 | Sample Type | Factor |
|-----------|--------------|-------|------------|------------|---------|---------|-------------|--------|
| ND2       | 83,4         | ng/µl | 2,086      | 1,849      | 1,13    | 0,16    | RNA         | 40,00  |

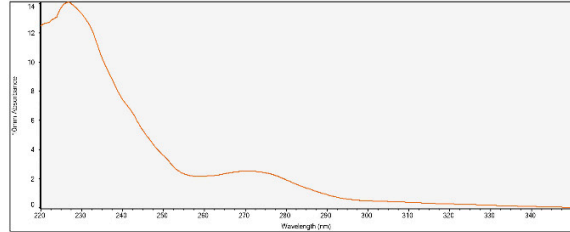

| Sample ID | Nucleic Acid | Unit  | A260 (Abs) | A280 (Abs) | 260/280 | 260/230 | Sample Type | Factor |
|-----------|--------------|-------|------------|------------|---------|---------|-------------|--------|
| PH1       | 173,0        | ng/µl | 4,325      | 5,811      | 0,74    | 0,28    | RNA         | 40,00  |

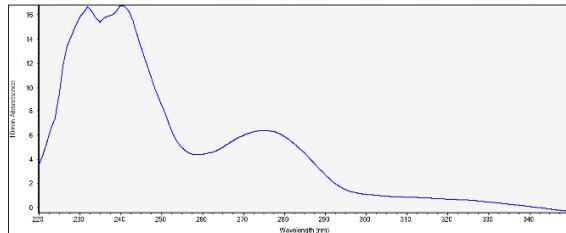

| Sample ID | Nucleic Acid | Unit  | A260 (Abs) | A280 (Abs) | 260/280 | 260/230 | Sample Type | Factor |
|-----------|--------------|-------|------------|------------|---------|---------|-------------|--------|
| PH2       | 146,4        | ng/µl | 3,661      | 3,972      | 0,92    | 0,20    | RNA         | 40,00  |

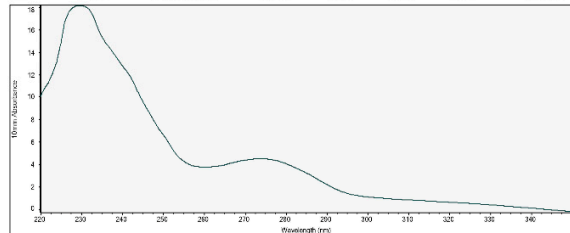

| Sample ID | Nucleic Acid | Unit  | A260 (Abs) | A280 (Abs) | 260/280 | 260/230 | Sample Type | Factor |
|-----------|--------------|-------|------------|------------|---------|---------|-------------|--------|
| RT1       | 395,2        | ng/µl | 9,881      | 7,617      | 1,30    | 0,28    | RNA         | 40,00  |

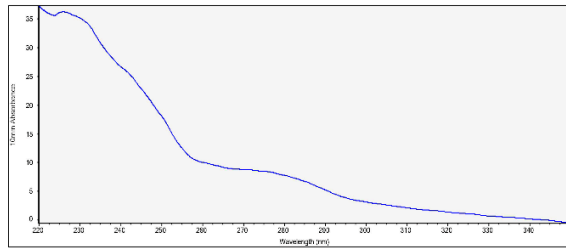

| Sample ID | Nucleic Acid | Unit  | A260 (Abs) | A280 (Abs) | 260/280 | 260/230 | Sample Type | Factor |
|-----------|--------------|-------|------------|------------|---------|---------|-------------|--------|
| RT2       | 253,8        | ng/µl | 6,345      | 5,018      | 1,26    | 0,24    | RNA         | 40,00  |

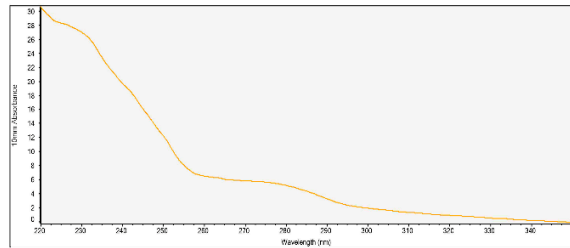

D.

TRIzol-column Hybrid Method

| Sample ID | Nucleic Acid | Unit | A260 (Abs) | A280 (Abs) | 260/280 | 260/230 | Sample Type | Factor |
|-----------|--------------|------|------------|------------|---------|---------|-------------|--------|
|-----------|--------------|------|------------|------------|---------|---------|-------------|--------|

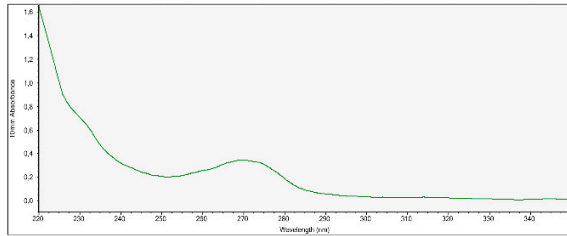

| Sample ID | Nucleic Acid | Unit | A260 (Abs) | A280 (Abs) | 260/280 | 260/230 | Sample Type | Factor |
|-----------|--------------|------|------------|------------|---------|---------|-------------|--------|
|-----------|--------------|------|------------|------------|---------|---------|-------------|--------|

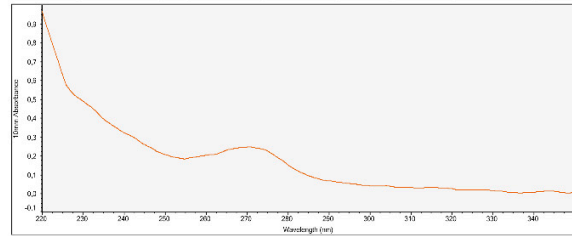

| Sample ID | Nucleic Acid | Unit | A260 (Abs) | A280 (Abs) | 260/280 | 260/230 | Sample Type | Factor |
|-----------|--------------|------|------------|------------|---------|---------|-------------|--------|
|-----------|--------------|------|------------|------------|---------|---------|-------------|--------|

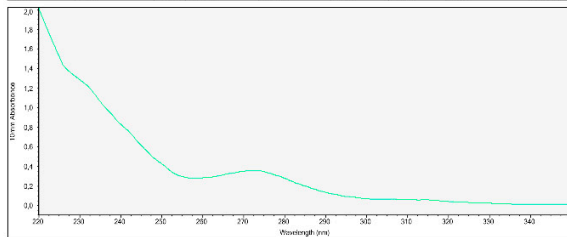

| Sample ID | Nucleic Acid | Unit | A260 (Abs) | A280 (Abs) | 260/280 | 260/230 | Sample Type | Factor |
|-----------|--------------|------|------------|------------|---------|---------|-------------|--------|
|-----------|--------------|------|------------|------------|---------|---------|-------------|--------|

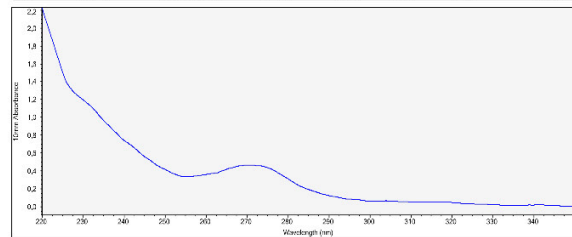

| Sample ID | Nucleic Acid | Unit | A260 (Abs) | A280 (Abs) | 260/280 | 260/230 | Sample Type | Factor |
|-----------|--------------|------|------------|------------|---------|---------|-------------|--------|
|-----------|--------------|------|------------|------------|---------|---------|-------------|--------|

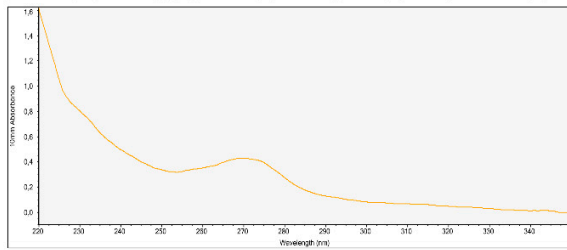

| Sample ID | Nucleic Acid | Unit | A260 (Abs) | A280 (Abs) | 260/280 | 260/230 | Sample Type | Factor |
|-----------|--------------|------|------------|------------|---------|---------|-------------|--------|
|-----------|--------------|------|------------|------------|---------|---------|-------------|--------|

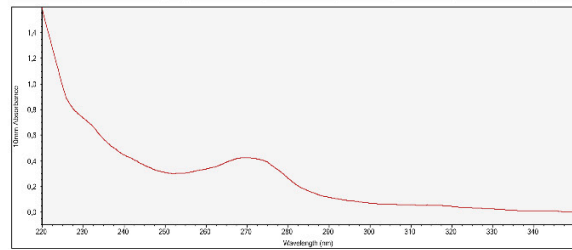

E.

CTAB Method

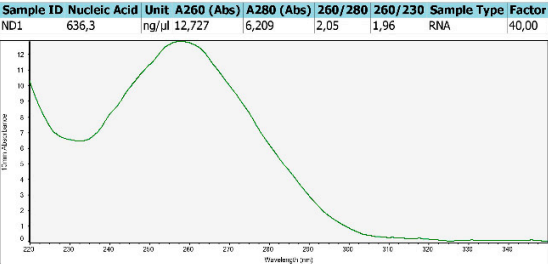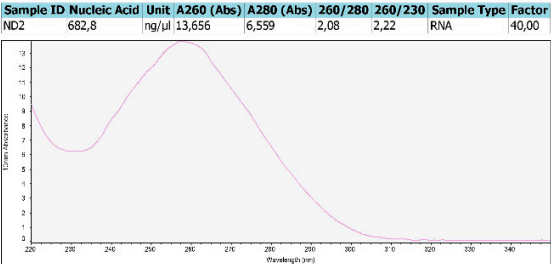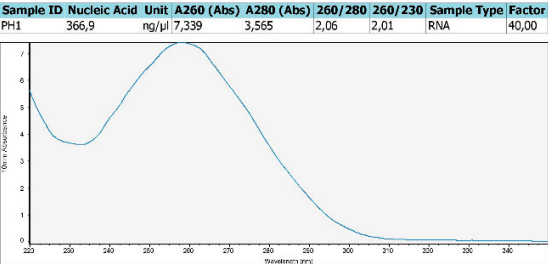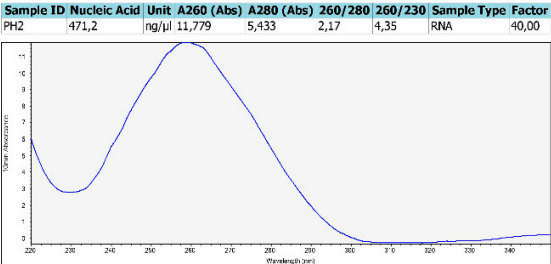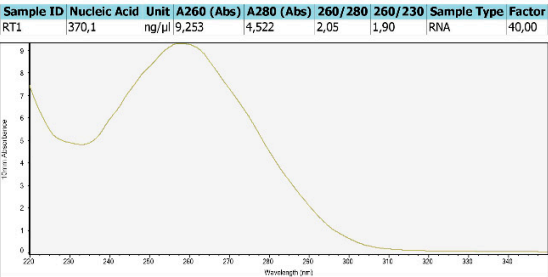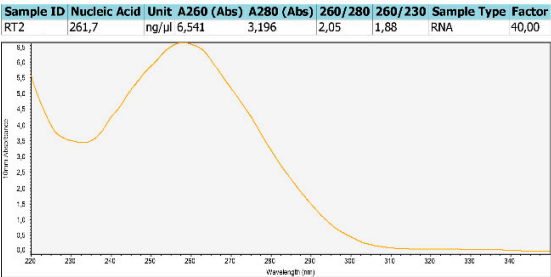

Supplement: s1 [file s1]
